# Supplementary material
Source: Research Square preprint supplement (doi:10.21203/rs.3.rs-9520207/v1)
Supplement: Supplementary file 1 [file 2ed156010f61fd3cfca9d483.docx]

**Table S1—**Sensitivity of posterior medians to scenario-driven prior shifts

| Parameter | Scenario | Median (95% CrI) | Δ vs baseline | Baseline median |
| --- | --- | --- | --- | --- |
| Eye sensitivity | Se1_m20pp | 0.175 (0.024-0.554) | -0.225 | 0.399 |
| Eye sensitivity | Se1_p20pp | 0.587 (0.249-0.863) | 0.188 | 0.399 |
| Eye sensitivity | Prev_p20pp | 0.276 (0.085-0.551) | -0.124 | 0.399 |
| Rectal sensitivity | Se2_p20pp | 0.518 (0.200-0.867) | 0.197 | 0.321 |
| Rectal sensitivity | Prev_p20pp | 0.140 (0.043-0.331) | -0.181 | 0.321 |
| Rectal sensitivity | Se2_m20pp | 0.160 (0.021-0.472) | -0.161 | 0.321 |
| Eye specificity | Prev_p20pp | 0.971 (0.891-0.999) | 0.03 | 0.941 |
| Eye specificity | Sp1_p05pp | 0.969 (0.898-1.000) | 0.029 | 0.941 |
| Eye specificity | Prev_p10pp | 0.963 (0.894-0.998) | 0.022 | 0.941 |
| Rectal specificity | Sp2_m10pp | 0.970 (0.933-0.994) | -0.019 | 0.989 |
| Rectal specificity | Se2_m20pp | 0.978 (0.939-0.999) | -0.011 | 0.989 |
| Rectal specificity | Sp2_p04pp | 0.998 (0.967-1.000) | 0.008 | 0.989 |
| Prevalence_ puppies | Prev_p20pp | 0.236 (0.110-0.434) | 0.155 | 0.081 |
| Prevalence_ puppies | Prev_p10pp | 0.147 (0.059-0.302) | 0.066 | 0.081 |
| Prevalence_ puppies | Prev_m05pp | 0.049 (0.006-0.140) | -0.031 | 0.081 |
| Prevalence_adults | Prev_p20pp | 0.257 (0.119-0.460) | 0.171 | 0.086 |
| Prevalence_adults | Prev_p10pp | 0.161 (0.062-0.322) | 0.075 | 0.086 |
| Prevalence_adults | Prev_m05pp | 0.050 (0.007-0.152) | -0.036 | 0.086 |

This table presents the top three prior sensitivity scenarios for each core parameter (eye sensitivity, rectal sensitivity, eye specificity, rectal specificity, and prevalence by age group) that produced the largest absolute changes in posterior medians relative to the baseline hierarchical BLCA. Columns show the scenario label, posterior median (95% credible interval) under that scenario, signed change versus the baseline (Δ), and the baseline median. Scenario labels indicate the type and magnitude of prior shift: “m/p” denotes a negative or positive shift in the prior mean by the specified percentage points (e.g., Se1_p20pp = eye test sensitivity prior shifted +20 pp), and Prev_pXXpt indicates prevalence prior shifts for both groups. All scenarios used the generalized-Beta dependence prior; none required fallback to a uniform dependence prior. Positive Δ values indicate an increase in the posterior median relative to the baseline.
